# Supplementary material for: Barriers between mothers and their adolescent daughters with regards to sexual and reproductive health communication in Taunggyi Township, Myanmar: What factors play important roles?
Source: PubMed Central journal article supplement (PMC6298679; doi:10.1371/journal.pone.0208849), 2018-12-18
Supplement: pone.0208849.s007.pdf [file pone.0208849.s007.pdf]

# QUESTIONNAIRE FOR FACE-TO-FACE INTERVIEW

ရှမ်းပြည်နယ် တောင်ကြီးမြို့ အမေနှင့် အရွယ်ရောက် သမီးများကြား မျိုးဆက်ပွားမှု ဆိုင်ရာ ကျန်းမာရေး ဆွေးနွေးရာ၌ ရှိသော အဟန့်အတားများ ဆန်းစစ်မေးခွန်းလွှာ

## Questionnaire for mother (Myanmar)

(ဤမေးခွန်းလွှာ၏ တစ်ဦးချင်းဖြေဆိုမှုများကိုလျှို့ဝှက်စွာထိန်းသိမ်းထားမည်ဖြစ်ပါသည်။)

ID|\_\_\_\_|

နေ့စွဲ.....

### အပိုင်း (၁) အမေ၏လူမှုပတ်ဝန်းကျင်အခြေအနေဆိုင်ရာမေးခွန်းလွှာ

| စဉ်  | မေးခွန်း                                                                                                                                                                                                           | အဖြေ |
|------|--------------------------------------------------------------------------------------------------------------------------------------------------------------------------------------------------------------------|------|
| 101. | သင်၏ပြည့်ပြီးအသက်                                                                                                                                                                                                  | _    |
| 102. | အမြင့်ဆုံးအောင်မြင်ခဲ့သောပညာရေး<br>(1) စာမတတ်<br>(2) စာရေးတတ်ဖတ်တတ်<br>(3) မူလတန်းအောင်<br>(4) အလယ်တန်းအောင်<br>(5) အထက်တန်းအောင်<br>(6) တက္ကသိုလ်၊ ကောလိပ်<br>(7) ဘွဲ့ရပြီးနှင့်အထက်<br>(8) အခြား(ဖော်ပြရန်.....) | _    |
| 103. | လူမျိုး<br>(1) ဗမာ<br>(2) ရှမ်း<br>(3) ပအိုဝ််<br>(4) ဓနု<br>(5) အခြား(ဖော်ပြရန်.....)                                                                                                                             | _    |
| 104. | ကိုးကွယ်သည်.ဘာသာ<br>(1) ဗုဒ္ဓဘာသာ<br>(2) ခရစ်ယာန်ဘာသာ<br>(3) ဟိန္ဒူဘာသာ<br>(4) အစ္စလာမ်ဘာသာ<br>(5) အခြား (ဖော်ပြရန်.....)                                                                                          | _    |
| 105. | လက်ရှိအလုပ်အကိုင်<br>(1) မှီခို<br>(2) ကျပန်းအလုပ်<br>(3) လယ်ယာစိုက်ပျိုးရေး<br>(4) ကိုယ်ပိုင်စီးပွားရေးလုပ်ငန်း၊ ဈေးဆိုင်<br>(5) အစိုးရဝန်ထမ်း<br>(6) ကုမ္ပဏီဝန်ထမ်း<br>(7) အခြား (ဖော်ပြရန်.....)                | _    |
| 106. | မိသားစုဝင်ဦးရေ                                                                                                                                                                                                     | _    |

|      |                                                                                                                             |   |
|------|-----------------------------------------------------------------------------------------------------------------------------|---|
| 107. | အိမ်ထောင်ရေးအခြေအနေ<br>(1) အိမ်ထောင်မရှိ<br>(2) အိမ်ထောင်ရှိ<br>(3) ကွာရှင်းထား<br>(4) မုဆိုးမ<br>(5) အခြား(ဖော်ပြရန်.....) | _ |
| 108. | သင်အိမ်ထောင်ပြုခဲ့သောအသက်                                                                                                   | _ |
| 109. | သားသမီး ဦးရေ                                                                                                                | _ |
| 110. | အငယ်ဆုံးကလေး၏အသက်                                                                                                           | _ |
| 111. | တစ်လမိသားစုပျမ်းမျှဝင်ငွေ                                                                                                   | _ |

အပိုင်း(၂) သမီးနှင့်မျိုးဆက်ပွား ကျန်းမာရေး ဆွေးနွေးရာတွင် မိခင်၏အမြင်

| စဉ်  | သမီးနှင့်မျိုးဆက်ပွား ကျန်းမာရေး ဆွေးနွေးရာတွင် မိခင်၏အမြင်                                                         | အလွန်<br>သဘော<br>တူသည် | သဘော<br>တူသည် | သဘော<br>မတူပါ | လုံးဝ<br>သဘော<br>မတူပါ |
|------|---------------------------------------------------------------------------------------------------------------------|------------------------|---------------|---------------|------------------------|
| 201. | မျိုးဆက်ပွားဆိုင်ရာ ကျန်းမာရေး ဆွေးနွေးခြင်းသည် သမီးအား လိင်ကိစ္စနှင့် ပတ်သက်ပြီး အားပေးရာရောက်နေသည်                |                        |               |               |                        |
| 202. | မျိုးဆက်ပွားမှုဆိုင်ရာ ကျန်းမာရေး အကြောင်းကို ပွင့်လင်းစွာ ဆွေးနွေးသင့်ပါသည်။                                       |                        |               |               |                        |
| 203. | သမီးသည် မျိုးဆက်ပွား ကျန်းမာရေး အကြောင်း သိနေပြီး ဖြစ်သော်လည်း မိခင် တစ်ယောက် အနေဖြင့် ဆက်ဆွေးနွေးရန် လိုအပ်ပါသည်။  |                        |               |               |                        |
| 204. | မျိုးဆက်ပွား ကျန်းမာရေး အကြောင်း သမီးအားမပြောပြခြင်းမှာ လက်မထပ်ရသေးသော မိန်းကလေးများ မသိသင့်သေး သောကြောင့် ဖြစ်သည်။ |                        |               |               |                        |
| 205. | ဆွေးနွေး လိုက်သောအခါမှ သမီးအား လိင်ကိစ္စနှင့် ပတ်သက်ပြီး မိမိကိုယ်တိုင် သတင်းပေးရာ သဘောမျိုး ဖြစ်နေမှာ ကြောက်ပါသည်။ |                        |               |               |                        |
| 206. | မျိုးဆက်ပွားဆိုင်ရာ ကျန်းမာရေး အကြောင်း ဆွေးနွေးဖို့ သမီးသည် အသက်ငယ်နေပါသေးသည်။                                     |                        |               |               |                        |
| 207. | သမီးကိုပြောပြရန် အတွက် မိမိ ကိုယ်တိုင် မျိုးဆက်ပွား ဆိုင်ရာ ကျန်းမာရေး အကြောင်းကို ပြည့်ပြည့်စုံစုံ သိပါသည်။        |                        |               |               |                        |
| 208. | ဘာသာရေးအရ မျိုးဆက်ပွားဆိုင်ရာ ကျန်းမာရေး အကြောင်း ဆွေးနွေးခြင်းကို ခွင့်ပြုထားပါသည်။                                |                        |               |               |                        |
| 209. | လေ့ထုံးတမ်း အရ အမေနှင့် သမီးကြား မျိုးဆက်ပွား ဆိုင်ရာ ကျန်းမာရေး ဆွေးနွေးခြင်းကို လက်မခံပါ။                         |                        |               |               |                        |
| 210. | မျိုးဆက်ပွား ကျန်းမာရေး အကြောင်း သမီးနှင့် ဆွေးနွေးရန် အချိန်မရှိပါ။                                                |                        |               |               |                        |

အပိုင်း(၃) အမေ၏ မျိုးဆက်ပွားဆိုင်ရာ ကျန်းမာရေး ဗဟုသုတ ဆန်းစစ်မေးခွန်းလွှာ

| စဉ်                 | မေးခွန်း                                                                                                                                                                                                                                                                                                                                                                                                            | ရမှတ်                                                                                                                                                                                                                                                        |
|---------------------|---------------------------------------------------------------------------------------------------------------------------------------------------------------------------------------------------------------------------------------------------------------------------------------------------------------------------------------------------------------------------------------------------------------------|--------------------------------------------------------------------------------------------------------------------------------------------------------------------------------------------------------------------------------------------------------------|
| 301.                | ဆယ်ကျော်သက်များ၏ မျိုးဆက်ပွားကျန်းမာရေး ပြဿနာများမှာ-----<br>(1) မရည်ရွယ်ဘဲ ကိုယ်ဝန်ရှိခြင်း<br>(2) အန္တရာယ်ရှိသော ကိုယ်ဝန်ဖျက်ချမှု<br>(3) လိင်မှတဆင့်ကူးစက် တတ်သော ရောဂါများ<br>(4) မိခင်သေဆုံးခြင်း<br>(5) ကိုယ်ဝန်ဆောင်နောက်ဆက်တွဲပြဿနာများ<br>(6) အခြား(ဖော်ပြရန်.....)<br>(7) မသိပါ                                                                                                                           | <br><input type="checkbox"/><br><input type="checkbox"/><br><input type="checkbox"/><br><input type="checkbox"/><br><input type="checkbox"/><br><input type="checkbox"/><br><input type="checkbox"/>                                                         |
| အပျိုဖော်ဝင် ဗဟုသုတ |                                                                                                                                                                                                                                                                                                                                                                                                                     |                                                                                                                                                                                                                                                              |
| 302.                | သင့်သည် ဆယ်ကျော်သက် အပျိုဖော်ဝင်ခြင်းကို မည်သို့ နားလည်ပါသနည်း။<br>(1) ရာသီလာလျှင်<br>(2) အသက်၁၅နှစ်ကျော်လျှင်<br>(3) မသိပါ                                                                                                                                                                                                                                                                                         | <br><input type="checkbox"/><br><input type="checkbox"/><br><input type="checkbox"/>                                                                                                                                                                         |
| 303.                | သင့်အပျိုဖော်ဝင်ချိန်က အပျိုဖော်ဝင်ခြင်းအကြောင်းကိုပြောပြကြသူများမှာ<br>(1) မိခင်<br>(2) မိဘ<br>(3) အမ၊ အကို<br>(4) သူငယ်ချင်း<br>(5) အခြား(ဖော်ပြရန်.....)                                                                                                                                                                                                                                                         | <br><input type="checkbox"/><br><input type="checkbox"/><br><input type="checkbox"/><br><input type="checkbox"/><br><input type="checkbox"/>                                                                                                                 |
| 304.                | ဆယ်ကျော်သက်များ အပျိုဖော်ဝင်စဉ် ရုပ်ပိုင်းဆိုင်ရာ ပြောင်းလဲမှုများ ကိုပြောပြပါ။<br>(1) သိသိသာသာအရပ်ရှည်လာခြင်း<br>(2) ရင်သားနှင့်တင်ဖွံ့ဖြိုးလာခြင်း<br>(3) ရာသီလာခြင်း<br>(4) ဂျိုင်းနှင့်ဆီးစပ်တွင် အမွှေးများ ပေါက်လာခြင်း<br>(5) အခြား(ဖော်ပြရန်.....)                                                                                                                                                          | <br><input type="checkbox"/><br><input type="checkbox"/><br><input type="checkbox"/><br><input type="checkbox"/><br><input type="checkbox"/>                                                                                                                 |
| 305.                | ဆယ်ကျော်သက်များ၏ အပျိုဖော်ဝင်စဉ် စိတ်ပိုင်းဆိုင်ရာ ပြောင်းလဲမှုများ ကိုပြောပြပါ။<br>(1) ရှက်တတ်ခြင်း<br>(2) စိတ်အပြောင်းအလဲမြန်ခြင်း<br>(3) ဆန့်ကျင်ဘက်လိင်စိတ်ဝင်စားလာခြင်း<br>(4) လှချင်ပချင်လာခြင်း<br>(5) အခြား(ဖော်ပြရန်.....)                                                                                                                                                                                 | <br><input type="checkbox"/><br><input type="checkbox"/><br><input type="checkbox"/><br><input type="checkbox"/><br><input type="checkbox"/>                                                                                                                 |
| 306.                | ဆယ်ကျော်သက်များ အပျိုဖော်ဝင်စဉ် လူမှုဆက်ဆံရေး ပြောင်းလဲမှုများ ကိုပြောပြပါ။<br>(1) အိမ်တွင်နေခြင်း<br>(2) သူငယ်ချင်းများနှင့်အပြင်ထွက်ခြင်း<br>(3) တစ်ယောက်ထဲအပြင်ထွက်ခြင်း<br>(4) စူးစမ်းချင်စိတ်ရှိခြင်း<br>(5) မူးယစ်ဆေးဝါးလက်တည်စမ်းချင်ခြင်း<br>(6) ရင်းနှီးသူများ၏ဖိအားပေးမှုရှိခြင်း<br>(7) လူကြီးများနှင့် သဘောထားကွဲလားခြင်း<br>(8) ဆိုရှယ်မီဒီယာများကို ကြိုက်နှစ်သက်လာခြင်း<br>(9) အခြား(ဖော်ပြရန်.....) | <br><input type="checkbox"/><br><input type="checkbox"/><br><input type="checkbox"/><br><input type="checkbox"/><br><input type="checkbox"/><br><input type="checkbox"/><br><input type="checkbox"/><br><input type="checkbox"/><br><input type="checkbox"/> |

| တားဆီးအကြောင်းဗဟုသုတ                          |                                                                                                                                                                                                                                                                                                                |                                                                                                                                                                                                                              |
|-----------------------------------------------|----------------------------------------------------------------------------------------------------------------------------------------------------------------------------------------------------------------------------------------------------------------------------------------------------------------|------------------------------------------------------------------------------------------------------------------------------------------------------------------------------------------------------------------------------|
| 307.                                          | သင်အပျိုဖော်ဝင်ချိန်က သင်သည် တားဆီး အကြောင်းကို မည်သူ့ထံမှ သိရှိခဲ့ပါသနည်း။<br>(1) မိခင်<br>(2) မိဘ<br>(3) အမ၊ အကို<br>(4) သူငယ်ချင်း<br>(5) အခြား(ဖော်ပြရန်.....)                                                                                                                                             | <input type="checkbox"/><br><input type="checkbox"/><br><input type="checkbox"/><br><input type="checkbox"/><br><input type="checkbox"/>                                                                                     |
| 308.                                          | သင်သိသော ကိုယ်ဝန်တားသည့်နည်းလမ်းများကို ပြောပြပါ။<br>(1) အရေးပေါ် သန္ဓေတားဆီး<br>(2) နေ့စဉ်သောက် သန္ဓေတားဆီး<br>(3) သန္ဓေတားဆီး ထိုးဆေးများ<br>(4) ကွန်ဒုံး<br>(5) သားအိမ်အတွင်း ထည့်ပစ္စည်း<br>(6) လက်မောင်းထဲတားဆီးထည့်ခြင်း<br>(7) သားကြောဖြတ်ခြင်း<br>(8) အခြား(ဖော်ပြရန်.....)                            | <input type="checkbox"/><br><input type="checkbox"/><br><input type="checkbox"/><br><input type="checkbox"/><br><input type="checkbox"/><br><input type="checkbox"/><br><input type="checkbox"/><br><input type="checkbox"/> |
| 309.                                          | အပျိုဖော်ဝင်မိန်းကလေးများနှင့်သင့်လျော်သောကိုယ်ဝန်တားသည့်နည်းလမ်းများကိုပြောပြပါ။<br>(1) အရေးပေါ်သန္ဓေတားဆီး<br>(2) နေ့စဉ်သောက် သန္ဓေတားဆီး<br>(3) သန္ဓေတားဆီးထိုးဆေးများ<br>(4) ကွန်ဒုံး<br>(5) သားအိမ်အတွင်းထည့်ပစ္စည်း<br>(6) လက်မောင်းထဲထည့်သောတားဆီး<br>(7) သားကြောဖြတ်ခြင်း<br>(8) အခြား(ဖော်ပြရန်.....) | <input type="checkbox"/><br><input type="checkbox"/><br><input type="checkbox"/><br><input type="checkbox"/><br><input type="checkbox"/><br><input type="checkbox"/><br><input type="checkbox"/><br><input type="checkbox"/> |
| လိင်မှတဆင့်ကူးစက်တတ်သောရောဂါများဆိုင်ရာဗဟုသုတ |                                                                                                                                                                                                                                                                                                                |                                                                                                                                                                                                                              |
| 310.                                          | သင်အပျိုဖော်ဝင်ချိန်က သင့်အား HIV/AIDS အပါအဝင် လိင်မှတဆင့် ကူးစက် တတ်သော ရောဂါများ အကြောင်း ကို ပြောပြ ကြံ့ခွဲသူများမှာ<br>(1) မိခင်<br>(2) မိဘ<br>(3) အမ၊ အကို<br>(4) သူငယ်ချင်း<br>(5) အခြား(ဖော်ပြရန်.....)                                                                                                 | <input type="checkbox"/><br><input type="checkbox"/><br><input type="checkbox"/><br><input type="checkbox"/><br><input type="checkbox"/>                                                                                     |
| 311.                                          | သင်သိသော လိင်မှတဆင့်ကူးစက်တတ်သော ရောဂါများမှာ<br>(1) HIV/AIDS<br>(2) ကာလသားရောဂါ<br>(3) ဆီးပူညောင့်ကျရောဂါ<br>(4) မှက်ခရု<br>(5) အသားဝါဘီပိုး<br>(6) အခြား(ဖော်ပြရန်.....)                                                                                                                                     | <input type="checkbox"/><br><input type="checkbox"/><br><input type="checkbox"/><br><input type="checkbox"/><br><input type="checkbox"/><br><input type="checkbox"/>                                                         |
| 312.                                          | HIV/AIDSအပါအဝင်လိင်မှတဆင့်ကူးစက်တတ်သောရောဂါများ၏ကူးစက်ပုံများမှာ<br>(1) ရောဂါပိုးရှိသူနှင့် အကာအကွယ်မဲ့လိင်ဆက်ဆံခြင်း<br>(2) ရောဂါပိုးရှိသူ ၏သွေးကိုသွင်းမိခြင်း<br>(3) ရောဂါပိုးရှိသောမိခင်မှသန္ဓေသားသို့ကူးခြင်း                                                                                             | <input type="checkbox"/><br><input type="checkbox"/><br><input type="checkbox"/>                                                                                                                                             |

|      |                                                                                                                                                                                                                                                                                                                                                                                                                                                   |                                                                                                                                                                                                                                                                                      |
|------|---------------------------------------------------------------------------------------------------------------------------------------------------------------------------------------------------------------------------------------------------------------------------------------------------------------------------------------------------------------------------------------------------------------------------------------------------|--------------------------------------------------------------------------------------------------------------------------------------------------------------------------------------------------------------------------------------------------------------------------------------|
|      | (4) မသန့်ရှင်းသောအပ်ဖြင့် ဆေးမင်ကြောင်ထိုးခြင်း၊နားဖောက်ခြင်း<br>(5) ဆေးထိုးအပ်များကိုမျှဝေသုံးစွဲခြင်း<br>(6) အခြား(ဖော်ပြရန်.....)<br>(7) မသိပါ                                                                                                                                                                                                                                                                                                 | <input type="checkbox"/><br><input type="checkbox"/><br><input type="checkbox"/><br><input type="checkbox"/>                                                                                                                                                                         |
| 313. | ကြိုတင်ကာကွယ်နိုင်သည့်နည်းလမ်းများမှာ<br>(1) လိင်ဆက်ဆံခြင်းမှရှောင်ခြင်း<br>(2) မိမိ၏လက်တွဲဖော်ကို သစ္စာရှိခြင်း<br>(3) အိမ်ထောင်ပြင်ပ လိင်ဆက်ဆံပါက ကွန်ဒုံးအသုံးပြုခြင်း<br>(4) သွေးမစစ်ဘဲ သွင်းခြင်းမှရှောင်ကြဉ်ခြင်း<br>(5) မသန့်ရှင်းသော အပ်ဖြင့် တက်တူးထိုးခြင်း၊ နားဖောက်ခြင်းမှရှောင်ကြဉ်ခြင်း<br>(6) ဆေးထိုးအပ်မျှဝေသုံးစွဲခြင်းမှရှောင်ကြဉ်ခြင်း<br>(7) ရောဂါရှိ အမေမှကလေးမကူးအောင်ကာကွယ်ခြင်း<br>(8) အခြား(ဖော်ပြရန်.....)<br>(9) မသိပါ | <input type="checkbox"/><br><input type="checkbox"/><br><input type="checkbox"/><br><input type="checkbox"/><br><input type="checkbox"/><br><input type="checkbox"/><br><input type="checkbox"/><br><input type="checkbox"/><br><input type="checkbox"/><br><input type="checkbox"/> |

**အပိုင်း (၄) အရွယ်ရောက်သမီးများ၏ မျိုးဆက်ပွားကျန်းမာရေးနှင့်ပတ်သက်၍ သင်နှင့် သင်၏ သမီးဆက်ဆံရေး**

|                                    |                                                                                                                                                                                                                                                                                                                                                                                                  |                                                                   |
|------------------------------------|--------------------------------------------------------------------------------------------------------------------------------------------------------------------------------------------------------------------------------------------------------------------------------------------------------------------------------------------------------------------------------------------------|-------------------------------------------------------------------|
| 401.                               | သင်သည် သင့်သမီးနှင့် မျိုးဆက်ပွားဆိုင်ရာ ကျန်းမာရေးအကြောင်း များကို ဆွေးနွေးဖူးပါသလား။<br>(1) ဆွေးနွေးဖူးပါသည်။<br>(2) မဆွေးနွေးဖူးပါ။                                                                                                                                                                                                                                                           | _                                                                 |
| ဆွေးနွေးသည့်အကြိမ်ရေ               |                                                                                                                                                                                                                                                                                                                                                                                                  |                                                                   |
| 402.                               | ဘယ်နှကြိမ်ဆွေးနွေးဖူးပါသနည်း<br>(1) လွန်ခဲ့သော ခြောက်လခန့်ကတစ်ကြိမ်မှ မဆွေးနွေးထားပါ<br>(2) လွန်ခဲ့သော ခြောက်လခန့်ကတစ်ကြိမ်မှ သုံးကြိမ်ဆွေးနွေးထားပါသည်<br>(3) လွန်ခဲ့သော ခြောက်လခန့်က လေးကြိမ် နှင့် အထက်ပို၍ ဆွေးနွေးထားပါသည်                                                                                                                                                                  | _                                                                 |
| ဆွေးနွေးဖြစ်သည့်အကြောင်းအရာများမှာ |                                                                                                                                                                                                                                                                                                                                                                                                  |                                                                   |
| 403.                               | သင်နှင့် သင်၏သမီးနှင့် ဆွေးနွေးသော မျိုးဆက်ပွား ဆိုင်ရာ ကျန်းမာရေးအကြောင်းများမှာ<br>(1) မျိုးပွားအင်္ဂါများလုပ်ဆောင်ပုံ<br>(2) အပျိုဖော်ဝင်ပြောင်းလဲမှုများ<br>(3) ရာသီသွေးပေါ်ခြင်း<br>(4) ကိုယ်ဝန်ရှိခြင်းအကြောင်း<br>(5) HIV/AIDSအပါအဝင်လိင်မှတဆင့်ကူးစက်တတ်သောရောဂါများ အကြောင်း<br>(6) သန္ဓေတားဆေးမှုအကြောင်း<br>(7) ကွန်ဒုံး အကြောင်း<br>(8) ရည်းစားအကြောင်း<br>(9) အခြား(ဖော်ပြရန်.....) | _  <br> _ |
| စတင်ဆွေးနွေးသည့်အရွယ်              |                                                                                                                                                                                                                                                                                                                                                                                                  |                                                                   |
| 404.                               | သင်ပြန်စဉ်းစားကြည့်ပါက သင်သည် သင့်သမီးအား မည်သည့် အရွယ်တွင် မျိုးဆက်ပွားကျန်းမာရေး အကြောင်း ပြောပြခဲ့သည်ဟု ထင်ပါသနည်း။<br>(1) သမီး အသက် ၉နှစ်နှင့် ၁၂နှစ်ကြား<br>(2) သမီး ရာသီလာချိန်<br>(3) သမီး အထက်တန်းကျောင်းတက်ချိန်<br>(4) သမီး ရည်းစားစတင်သည့်အချိန်<br>(5) သမီး မျိုးဆက်ပွားဆိုင်ရာမေးခွန်းမေးစမေးသည့်အချိန်<br>(6) ကျွန်မမှ စမပြောပြခဲ့ပါ                                               | _  <br> _  <br> _  <br> _  <br> _  <br> _                         |
| ဆက်သွယ်ရေးဟန်ပန်အမှုအရာ            |                                                                                                                                                                                                                                                                                                                                                                                                  |                                                                   |
| 405.                               | သင်သည် မျိုးဆက်ပွားကျန်းမာရေးကို သမီးနှင့် မည်သို့ ဆွေးနွေးပါသနည်း။<br>(1) စိတ်ပါလက်ပါနဲ့ ပြည့်ပြည့်စုံစုံ ရှင်းပြတယ်။<br>(2) မေးခွန်းပေါ်မူတည်ပြီး သူတို့သိသင့်သည်ကိုသာ ရှင်းပြသည်။<br>(3) စိတ်ပါလက်ပါ မရှင်းပြဖြစ်ပါ။<br>(4) မေးခွန်းမေးခွင့် မပေးပါ။<br>(5) လုံးဝရှင်းမပြ၊ အဖြေမပေးပါ။                                                                                                        | _                                                                 |

**Questionnaires for Adolescent girl (Myanmar)**

(ဤမေးခွန်းလွှာ၏ တစ်ဦးချင်းဖြေဆိုမှုများကိုလျှို့ဝှက်စွာထိန်းသိမ်းထားမည်ဖြစ်ပါသည်။)

ID|\_|\_|\_|\_|

နေ့စွဲ.....

**အပိုင်း (၁) အရွယ်ရောက် မိန်းကလေးများ၏ လူမှုစီးပွားရေးအခြေအနေဆိုင်ရာမေးခွန်းလွှာ**

| စဉ်  | မေးခွန်း                                                | အဖြေ                                                                                                                                                                       |
|------|---------------------------------------------------------|----------------------------------------------------------------------------------------------------------------------------------------------------------------------------|
| 101. | သင်၏ပြည့်ပြီးအသက်                                       | ----- နှစ်                                                                                                                                                                 |
| 102. | အမြင့်ဆုံးအောင်မြင်ခဲ့သော ပညာရေး                        | ၁.စာမတတ်<br>၂.စာရေးတတ်ဖတ်တတ်<br>၃.မူလတန်းအောင်<br>၄.အလယ်တန်းအောင်<br>၅.အထက်တန်းအောင်<br>၆.တက္ကသိုလ်၊ ကောလိပ်<br>၇.ဘွဲ့ရပြီးနှင့်အထက်<br>၈.အခြား (ဖော်ပြရန်.....)           |
| 103. | အလုပ်အကိုင်                                             | ၁.မိမိ/ ကျောင်းသား<br>၂.ကျပန်းအလုပ်<br>၃.လယ်ယာစိုက်ပျိုးရေး<br>၄.ကိုယ်ပိုင်စီးပွားရေးလုပ်ငန်း၊ ဈေးဆိုင်<br>၅.အစိုးရဝန်ထမ်း<br>၆.ကုမ္ပဏီဝန်ထမ်း<br>၇.အခြား (ဖော်ပြရန်.....) |
| 104. | သင်သည်သင်၏ မွေးချင်းထဲတွင် ဘယ်နယောက်မြောက်သမီး ဖြစ်သလဲ။ | _                                                                                                                                                                          |
| 105. | အသက်ရှင်နေထိုင်မှု                                      | ၁. အမေနှင့်နေထိုင်<br>၂.အဖေနှင့်နေထိုင်<br>၃. မိဘများနှင့်နေထိုင်<br>၄.ဆွေမျိုးများနှင့်နေထိုင်<br>၅.သူငယ်ချင်းများနှင့်နေထိုင်<br>၆.အခြား (ဖော်ပြရန်.....)                |
| 106. | အတူတကွ နေထိုင်ခဲ့သော မိသားစုအမျိုးအစား                  | ၁.မိဘနှင့်သားသမီးအတူတကွနေထိုင်ကြခြင်း။<br>၂.မိဘ၊သားသမီး၊ဆွေမျိုး၊အခြားသူများနှင့်အတူ တကွနေထိုင်ကြခြင်း။<br>၃.အဘိုးအဘွား၊သားသမီး၊မြေးများနှင့် အတူတကွ နေထိုင်ကြခြင်း။       |
| 107. | လူမျိုး                                                 | ၁.ဗမာ<br>၂.ပအို<br>၃.ရှမ်း<br>၄.ဓနု<br>၅.အခြား (ဖော်ပြရန်.....)                                                                                                            |



|      |                             |                                                                                                  |   |
|------|-----------------------------|--------------------------------------------------------------------------------------------------|---|
| 108. | ကိုးကွယ်သည့်ဘာသာ            | ၁. ဗုဒ္ဓဘာသာ<br>၂. ခရစ်ယာန်ဘာသာ<br>၃. ဟိန္ဒူဘာသာ<br>၄. အစ္စလာမ်ဘာသာ<br>၅. အခြား (ဖော်ပြရန်.....) | _ |
| 109. | တစ်ရက်ပျမ်းမျှ နံနက် (ကျပ်) |                                                                                                  | _ |

အပိုင်း (၂) အမေနှင့်မျိုးဆက်ပွား ကျန်းမာရေး ဆွေးနွေးရာတွင် အရွယ်ရောက်သမီး၏အမြင်

| စဉ်  | အမေနှင့် မျိုးဆက်ပွား ကျန်းမာရေး ဆွေးနွေးရာတွင် အရွယ်ရောက်သမီး ၏ အမြင်                                                | အလွန် သဘော တူသည် | သဘော တူသည် | သဘော မတူပါ | လုံးဝ သဘော မတူပါ |
|------|-----------------------------------------------------------------------------------------------------------------------|------------------|------------|------------|------------------|
| 201. | မျိုးဆက်ပွားမှုဆိုင်ရာ ကျန်းမာရေးအကြောင်းအား အမေနှင့် ဆွေးနွေးခြင်းမှာ ရှက်ဖို့ မကောင်းပါ။                            |                  |            |            |                  |
| 202. | မျိုးဆက်ပွားမှုဆိုင်ရာ ကျန်းမာရေး အကြောင်း အမေနှင့် ဆွေးနွေးရခြင်းမှာ စိတ်ဖိစီးမှုများပါသည်။                          |                  |            |            |                  |
| 203. | မျိုးဆက်ပွားမှုဆိုင်ရာ ကျန်းမာရေး အကြောင်း အမေနှင့် မည်သည်ကစ၍ ဆွေးနွေးရမည်ကို မသိပါ။                                  |                  |            |            |                  |
| 204. | မျိုးဆက်ပွားမှု ဆိုင်ရာ ကျန်းမာရေး အကြောင်း အမေနှင့် ဆွေးနွေးချင် ပါသော်လည်း အမေမှ တမျိုးမြင်မှာ ကြောက်ပါသည်။         |                  |            |            |                  |
| 205. | မျိုးဆက်ပွား ဆိုင်ရာ ကျန်းမာရေး ဆွေးနွေးလျှင် အမေမှ ဆိုးဆိုးရွားရွား တုံ့ပြန်မည်၊ ဆူပူ ရိုက်နှက်မည် ကို ကြောက် ပါသည်။ |                  |            |            |                  |
| 206. | အမေသည် မျိုးဆက်ပွားဆိုင်ရာ ကျန်းမာရေး အကြောင်းကို ပြောပြချင်ပါသည်။                                                    |                  |            |            |                  |
| 207. | အမေသည် မျိုးဆက်ပွား ဆိုင်ရာ ကျန်းမာရေး အကြောင်းကို ပြည့်ပြည့်စုံစုံ သိပါသည်။                                          |                  |            |            |                  |
| 208. | ဘာသာရေးသည် မျိုးဆက်ပွား ဆိုင်ရာ ကျန်းမာရေး အကြောင်း ဆွေးနွေးခြင်းကို ပိတ်ပင်ထားသည် ဟု ထင်ပါသည်။                       |                  |            |            |                  |
| 209. | အမေနှင့် သမီးကြား မျိုးဆက်ပွား ကျန်းမာရေး အကြောင်း ဆွေးနွေးခြင်းကို ဓလေ့ထုံးတမ်းအရ လက်ခံပါသည်။                        |                  |            |            |                  |
| 210. | အမေသည် အလုပ်များ သောကြောင့် မျိုးဆက်ပွား ဆိုင်ရာ ကျန်းမာရေး အကြောင်း ဆွေးနွေးရန် အချိန်မပေးပါ။                        |                  |            |            |                  |

အပိုင်း (၃) အရွယ်ရောက်မိန်းကလေးများ၏ မျိုးဆက်ပွားဆိုင်ရာ ကျန်းမာရေး အသိပညာ မေးခွန်းများ

|                    |                                                                                                                                                                                                                                                                                                                                                                                       |                                                                                                                                                                                                                                                          |
|--------------------|---------------------------------------------------------------------------------------------------------------------------------------------------------------------------------------------------------------------------------------------------------------------------------------------------------------------------------------------------------------------------------------|----------------------------------------------------------------------------------------------------------------------------------------------------------------------------------------------------------------------------------------------------------|
| 301.               | ဆယ်ကျော်သက် မျိုးဆက်ပွားကျန်းမာရေး ပြဿနာများမှာ-----<br>(1) မရည်ရွယ်ဘဲ ကိုယ်ဝန်ရှိခြင်း<br>(2) အန္တရာယ်ရှိသော ကိုယ်ဝန်ဖျက်ချမှု<br>(3) လိင်မှတစ်ဆင့်ကူးစက် တတ်သော ရောဂါများ<br>(4) မိခင်သေဆုံးခြင်း<br>(5) ကိုယ်ဝန်ဆောင်နောက်ဆက်တွဲပြဿနာများ<br>(6) အခြား(ဖော်ပြရန်.....)<br>(7) မသိပါ                                                                                                | <input type="checkbox"/><br><input type="checkbox"/><br><input type="checkbox"/><br><input type="checkbox"/><br><input type="checkbox"/><br><input type="checkbox"/><br><input type="checkbox"/>                                                         |
| အပျိုဖော်ဝင်ဗဟုသုတ |                                                                                                                                                                                                                                                                                                                                                                                       |                                                                                                                                                                                                                                                          |
| 302.               | သင်သည် အပျိုဖော်ဝင်ခြင်းကို မည်သို့ နားလည်ပါသနည်း။<br>(1) ရာသီလာလျှင်<br>(2) အသက်၁၅နှစ်ကျော်လျှင်<br>(3) မသိပါ                                                                                                                                                                                                                                                                        | <input type="checkbox"/><br><input type="checkbox"/><br><input type="checkbox"/>                                                                                                                                                                         |
| 303.               | အပျိုဖော်ဝင်ခြင်းအကြောင်းကိုပြောပြကြသူများမှာ<br>(1) မိခင်<br>(2) မိဘ<br>(3) အမ၊ အကို<br>(4) သူငယ်ချင်း<br>(5) အခြား(ဖော်ပြရန်.....)                                                                                                                                                                                                                                                  | <input type="checkbox"/><br><input type="checkbox"/><br><input type="checkbox"/><br><input type="checkbox"/><br><input type="checkbox"/>                                                                                                                 |
| 304.               | ရုပ်ပိုင်းဆိုင်ရာပြောင်းလဲမှုများမှာ<br>(1) သိသိသာသာအရပ်ရှည်လာခြင်း<br>(2) ရင်သားနှင့်တင်ဖွံ့ဖြိုးလာခြင်း<br>(3) ရာသီလာခြင်း<br>(4) ဂိုဏ်းနှင့်ဆီးစပ်တွင် အမွှေးများ ပေါက်လာခြင်း<br>(5) အခြား(ဖော်ပြရန်.....)                                                                                                                                                                        | <input type="checkbox"/><br><input type="checkbox"/><br><input type="checkbox"/><br><input type="checkbox"/><br><input type="checkbox"/>                                                                                                                 |
| 305.               | စိတ်ပိုင်းဆိုင်ရာပြောင်းလဲမှုများမှာ<br>(1) ရှက်တတ်ခြင်း<br>(2) စိတ်အပြောင်းအလဲမြန်ခြင်း<br>(3) ဆန့်ကျင်ဘက်လိင်စိတ်ဝင်စားလာခြင်း<br>(4) လှချင်ပချင်လာခြင်း<br>(5) အခြား(ဖော်ပြရန်.....)                                                                                                                                                                                               | <input type="checkbox"/><br><input type="checkbox"/><br><input type="checkbox"/><br><input type="checkbox"/><br><input type="checkbox"/>                                                                                                                 |
| 306.               | လူမှုဆက်ဆံရာတွင်ပြောင်းလဲမှုများကိုပြောပြပါ။<br>(1) အိမ်တွင်နေခြင်း<br>(2) သူငယ်ချင်းများနှင့်အပြင်ထွက်ခြင်း<br>(3) တစ်ယောက်ထဲအပြင်ထွက်ခြင်း<br>(4) စူးစမ်းချင်စိတ်ရှိခြင်း<br>(5) မူးယစ်ဆေးဝါးလက်တည့်စမ်းချင်ခြင်း<br>(6) ရင်းနှီးသူများ၏ဖိအားပေးမှုရှိခြင်း<br>(7) လူကြီးများနှင့် သဘောထားကွဲလားခြင်း<br>(8) ဆိုရှယ်မီဒီယာများကို ကြိုက်နှစ်သက်လာခြင်း<br>(9) အခြား(ဖော်ပြရန်.....) | <input type="checkbox"/><br><input type="checkbox"/><br><input type="checkbox"/><br><input type="checkbox"/><br><input type="checkbox"/><br><input type="checkbox"/><br><input type="checkbox"/><br><input type="checkbox"/><br><input type="checkbox"/> |

| တားဆီးအကြောင်းဗဟုသုတ                             |                                                                                                                                                                                                                                                                                                               |                                                                                                                                                                                                                              |
|--------------------------------------------------|---------------------------------------------------------------------------------------------------------------------------------------------------------------------------------------------------------------------------------------------------------------------------------------------------------------|------------------------------------------------------------------------------------------------------------------------------------------------------------------------------------------------------------------------------|
| 307.                                             | တားဆီး အကြောင်းကိုပြောပြကြသူများမှာ<br>(1) မိခင်<br>(2) မိဘ<br>(3) အမ၊ အကို<br>(4) သူငယ်ချင်း<br>(5) အခြား(ဖော်ပြရန်.....)                                                                                                                                                                                    | <input type="checkbox"/><br><input type="checkbox"/><br><input type="checkbox"/><br><input type="checkbox"/><br><input type="checkbox"/>                                                                                     |
| 308.                                             | သင်သိသည့်ကိုယ်ဝန်တားသည့်နည်းလမ်းများကိုပြောပြပါ။<br>(1) အရေးပေါ်သန္ဓေတားဆီး<br>(2) နေ့စဉ်သောက် သန္ဓေတားဆီး<br>(3) သန္ဓေတားဆီးထိုးဆေးများ<br>(4) ကွန်ဒိုမ်<br>(5) သားအိမ်အတွင်းထည့်ပစ္စည်း<br>(6) လက်မောင်းထဲထည့်သောတားဆီး<br>(7) သားကြောဖြတ်ခြင်း<br>(8) အခြား(ဖော်ပြရန်.....)                                | <input type="checkbox"/><br><input type="checkbox"/><br><input type="checkbox"/><br><input type="checkbox"/><br><input type="checkbox"/><br><input type="checkbox"/><br><input type="checkbox"/><br><input type="checkbox"/> |
| 309.                                             | အပျိုဖော်ဝင်မိန်းကလေးများနှင့်သင့်လျော်သောကိုယ်ဝန်တားသည့်နည်းလမ်းများကိုပြောပြပါ<br>(1) အရေးပေါ်သန္ဓေတားဆီး<br>(2) နေ့စဉ်သောက်သန္ဓေတားဆီး<br>(3) သန္ဓေတားဆီးထိုးဆေးများ<br>(4) ကွန်ဒိုမ်<br>(5) သားအိမ်အတွင်းထည့်ပစ္စည်း<br>(6) လက်မောင်းထဲထည့်သောတားဆီး<br>(7) သားကြောဖြတ်ခြင်း<br>(8) အခြား(ဖော်ပြရန်.....) | <input type="checkbox"/><br><input type="checkbox"/><br><input type="checkbox"/><br><input type="checkbox"/><br><input type="checkbox"/><br><input type="checkbox"/><br><input type="checkbox"/><br><input type="checkbox"/> |
| လိင်မှတစ်ဆင့်ကူးစက်တတ်သောရောဂါများအကြောင်းဗဟုသုတ |                                                                                                                                                                                                                                                                                                               |                                                                                                                                                                                                                              |
| 310.                                             | HIV/AIDS အပါအဝင် လိင်မှတစ်ဆင့် ကူးစက်တတ်သောရောဂါများ<br>အကြောင်းကိုပြောပြကြသူများမှာ<br>(1) မိခင်<br>(2) မိဘ<br>(3) အမ၊ အကို<br>(4) သူငယ်ချင်း<br>(5) အခြား(ဖော်ပြရန်.....)                                                                                                                                   | <input type="checkbox"/><br><input type="checkbox"/><br><input type="checkbox"/><br><input type="checkbox"/><br><input type="checkbox"/>                                                                                     |
| 311.                                             | လိင်မှတစ်ဆင့်ကူးစက်တတ်သောရောဂါများမှာ<br>(1) HIV/AIDS<br>(2) ကာလသားရောဂါ<br>(3) ဆီးပူညောင့်ကျရောဂါ<br>(4) မှက်ခရု<br>(5) အသားဝါဘီပိုး<br>(6) အခြား(ဖော်ပြရန်.....)                                                                                                                                            | <input type="checkbox"/><br><input type="checkbox"/><br><input type="checkbox"/><br><input type="checkbox"/><br><input type="checkbox"/><br><input type="checkbox"/>                                                         |
| 312.                                             | HIV/AIDSအပါအဝင်လိင်မှတစ်ဆင့်ကူးစက်တတ်သောရောဂါများ၏ကူးစက်ပုံများမှာ<br>(1) ရောဂါပိုးရှိသူနှင့် အကာအကွယ်မဲ့လိင်ဆက်ဆံခြင်း<br>(2) ရောဂါပိုးရှိသူ ၏ သွေးကိုသွင်းမိခြင်း<br>(3) ရောဂါပိုးရှိသော မိခင်မှ သန္ဓေသား သို့ကူးခြင်း                                                                                      | <input type="checkbox"/><br><input type="checkbox"/><br><input type="checkbox"/>                                                                                                                                             |

|      |                                                                                                                                                                                                                                                                                                                                                                                                                                                                |                                                                                                                                                                                                                                                          |
|------|----------------------------------------------------------------------------------------------------------------------------------------------------------------------------------------------------------------------------------------------------------------------------------------------------------------------------------------------------------------------------------------------------------------------------------------------------------------|----------------------------------------------------------------------------------------------------------------------------------------------------------------------------------------------------------------------------------------------------------|
|      | (4) မသန့်ရှင်းသောအပ်ဖြင့် ဆေးမင်ကြောင်ထိုးခြင်း၊ နားဖောက်ခြင်း<br>(5) ဆေးထိုးအပ်များကိုမျှဝေသုံးစွဲခြင်း<br>(6) အခြား(ဖော်ပြရန်.....)<br>(7) မသိပါ                                                                                                                                                                                                                                                                                                             | <input type="checkbox"/><br><input type="checkbox"/><br><input type="checkbox"/><br><input type="checkbox"/>                                                                                                                                             |
| 313. | ကြိုတင်ကာကွယ်နိုင်သည့်နည်းလမ်းများမှာ<br>(1) လိင်ဆက်ဆံခြင်းကို လုံးဝရှောင်ခြင်း<br>(2) မိမိ၏လက်တွဲဖော်ကို သစ္စာရှိခြင်း<br>(3) အိမ်ထောင်ပြင်ပ လိင်ဆက်ဆံပါက ကွန်ဒုံးအသုံးပြုခြင်း<br>(4) သွေးမစစ်ဘဲ သွင်းခြင်းမှရှောင်ကြဉ်ခြင်း<br>(5) မသန့်ရှင်းသောအပ်ဖြင့် ဆေးမင်ကြောင်ထိုးခြင်း၊ နားဖောက်ခြင်း မှရှောင်ကြဉ်ခြင်း<br>(6) ဆေးထိုးအပ်မျှဝေသုံးစွဲခြင်းမှရှောင်ကြဉ်ခြင်း<br>(7) ရောဂါရှိအမေမှ ကလေးမကူးအောင်ကာကွယ်ခြင်း<br>(8) အခြား(ဖော်ပြရန်.....)<br>(9) မသိပါ | <input type="checkbox"/><br><input type="checkbox"/><br><input type="checkbox"/><br><input type="checkbox"/><br><input type="checkbox"/><br><input type="checkbox"/><br><input type="checkbox"/><br><input type="checkbox"/><br><input type="checkbox"/> |

အပိုင်း ( ၄ ) မျိုးဆက်ပွားမှုဆိုင်ရာကျန်းမာရေးတွင်သမီးမှ မိခင်သို့ဆက်နွယ်ပုံ ဆိုင်ရာမေးခွန်းများ

|                                    |                                                                                                                                                                                                                                                                                                                                                                                     |                                                           |
|------------------------------------|-------------------------------------------------------------------------------------------------------------------------------------------------------------------------------------------------------------------------------------------------------------------------------------------------------------------------------------------------------------------------------------|-----------------------------------------------------------|
| 401.                               | သင်သည် သင်၏ မိခင်နှင့် မျိုးဆက်ပွား ဆိုင်ရာ ကျန်းမာရေးအကြောင်း များကို ဆွေးနွေးဖူးပါသည်။<br>(1) ဆွေးနွေးဖူးပါသည်<br>(2) မဆွေးနွေးဖူးပါ                                                                                                                                                                                                                                              | _                                                         |
| ဆွေးနွေးသည့်အကြိမ်ရေ               |                                                                                                                                                                                                                                                                                                                                                                                     |                                                           |
| 402.                               | ဘယ်နှကြိမ်ဆွေးနွေးဖူးပါသနည်း<br>(1) လွန်ခဲ့သော ခြောက်လခန့်က တစ်ကြိမ်မှ မဆွေးနွေးထားပါ<br>(2) လွန်ခဲ့သောခြောက်လခန့်က တစ်ကြိမ်မှသုံးကြိမ် ဆွေးနွေးထားပါသည်<br>(3) လွန်ခဲ့သော ခြောက်လခန့်က လေးကြိမ်နှင့်အထက်ပို၍ ဆွေးနွေးထားပါသည်                                                                                                                                                      | _                                                         |
| ဆွေးနွေးဖြစ်သည့်အကြောင်းအရာများမှာ |                                                                                                                                                                                                                                                                                                                                                                                     |                                                           |
| 403.                               | သင်၏မိခင်နှင့် သင် ဆွေးနွေးသော မျိုးဆက်ပွား ဆိုင်ရာကျန်းမာရေးအကြောင်းများမှာ<br>(1) မျိုးပွားအင်္ဂါများလုပ်ဆောင်ပုံ<br>(2) အပျိုဖော်ဝင်ပြောင်းလဲမှုများ<br>(3) ရာသီသွေးပေါ်ခြင်း<br>(4) ကိုယ်ဝန်ရှိခြင်း<br>(5) HIV/AIDSအပါအဝင်လိင်မှတဆင့်ကူးစက်တတ်သောရောဂါများ အကြောင်း<br>(6) သန္ဓေတားဆေးမှုအကြောင်း<br>(7) ကွန်ဒုံး အကြောင်း<br>(8) ရည်းစားအကြောင်း<br>(9) အခြား(ဖော်ပြရန်.....) | _  <br> _ |
| စတင်ဆွေးနွေးသည်အရွယ်               |                                                                                                                                                                                                                                                                                                                                                                                     |                                                           |
| 404.                               | သင်ပြန်စဉ်းစား ကြည့်ပါက သင်မည်သည့် အရွယ်တွင် သင့်မိခင်မှ မျိုးဆက်ပွား ကျန်းမာရေး အကြောင်း ပြောခဲ့သည်ဟု ထင်ပါသနည်း။<br>(1) အသက် ၉နှစ်နှင့် ၁၂နှစ်ကြား<br>(2) ရာသီလာချိန်<br>(3) အထက်တန်းကျောင်းတက်ချိန်<br>(4) ရည်းစားစထားသည့်အချိန်<br>(5) မျိုးဆက်ပွားဆိုင်ရာမေးခွန်း သင်မှ အမေကို စမေးသည့်အချိန်<br>(6) အမေမှ စမပြောပြခဲ့ပါ                                                       | _                                                         |
| ဆက်သွယ်ရေးဟန်ပန်အမူအရာ             |                                                                                                                                                                                                                                                                                                                                                                                     |                                                           |
| 405.                               | မျိုးဆက်ပွားကျန်းမာရေးကို သင့်မိခင်မှ မည်သို့ ဆွေးနွေးပါသနည်း<br>(1) စိတ်ပါလက်ပါနဲ့ ပြည့်ပြည့်စုံစုံ ရှင်းပြပါသည်။<br>(2) မေးခွန်းပေါ်မူတည်ပြီး လိုအပ်သည်ဟုထင်သည်များကိုသာ ရှင်းပြပါသည်။<br>(3) စိတ်ပါလက်ပါ မရှင်းပြပါ။<br>(4) မေးခွန်းမေးခွင့် မပေးပါ။<br>(5) လုံးဝရှင်းမပြ၊ အဖြေမပေးပါ။                                                                                           | _                                                         |

## Questionnaire forms for Mother (English)

This questionnaire is only for research and the result will be kept confidential.

ID |\_| |\_| |\_|

Date -----

### Section (1) Socio-demographic characteristics of mother

| No.  | Question                                                                                                                                                                                                              | Code |
|------|-----------------------------------------------------------------------------------------------------------------------------------------------------------------------------------------------------------------------|------|
| 101. | Respondent's age in completed year                                                                                                                                                                                    | _ _  |
| 102. | Education<br>(1) Illiterate<br>(2) Read and write<br>(3) Primary school passed<br>(4) Middle school passed<br>(5) High school passed<br>(6) University<br>(7) Graduate and above<br>(8) Others (please specify) ----- | _    |
| 103. | Ethnicity<br>(1) Burmese<br>(2) Shan<br>(3) Pa-Oh<br>(4) Danu<br>(5) Others (please specify) -----                                                                                                                    | _    |
| 104. | Religion<br>(1) Buddhist<br>(2) Christian<br>(3) Hindu<br>(4) Islam<br>(5) Others(please specify) -----                                                                                                               | _    |
| 105. | Current employment<br>(1) Dependent<br>(2) Odd job<br>(3) Farmer<br>(4) Own business/ shop owner<br>(5) Government staff<br>(6) Company staff<br>(7) Others (please specify) -----                                    | _    |
| 106. | No. of household members -----                                                                                                                                                                                        | _ _  |
| 107. | Current marital status<br>(1) Single<br>(2) Married<br>(3) Divorced                                                                                                                                                   | _    |

|      |                                   |           |
|------|-----------------------------------|-----------|
|      | (4) Widow                         |           |
|      | (5) Others (please specify) ----- |           |
| 108. | Age of marriage                   | _ _       |
| 109. | Number of alive children          | _ _       |
| 110. | Age of youngest children          | _ _       |
| 111. | Monthly family income             | _ _ _ _ _ |



**Section (2) Mother's perception on communicating with adolescent girls towards SRH**

| No.  | Perception on communicating with adolescent girls towards SRH issues                         | SA | A | D | SD |
|------|----------------------------------------------------------------------------------------------|----|---|---|----|
| 201. | Talking about SRH issues would encourage my daughter to be sexually active.                  |    |   |   |    |
| 202. | SRH issues should be discussed openly                                                        |    |   |   |    |
| 203. | My daughter knows about SRH but I need to talk about it.                                     |    |   |   |    |
| 204. | I do not talk to my daughter about SRH because I am against it for unmarried girls.          |    |   |   |    |
| 205. | I fear I may provide too much sexual information if I discuss sex with my daughter.          |    |   |   |    |
| 206. | My daughter is too young to tell about SRH issues                                            |    |   |   |    |
| 207. | I really know enough about SRH issues to talk about them with my daughter.                   |    |   |   |    |
| 208. | Religion is allowed to discuss SRH issues with my daughter,                                  |    |   |   |    |
| 209. | Discussing SRH issue is not traditionally acceptable between mother and adolescent daughter. |    |   |   |    |
| 210. | I find it difficult to find time to talk to my daughter about SRH.                           |    |   |   |    |

**Section (3) Mother's Knowledge on Adolescent Reproductive health problems**

|                               |                                                                                                                                                                                                                           |                                                                                                                                                                                                  |
|-------------------------------|---------------------------------------------------------------------------------------------------------------------------------------------------------------------------------------------------------------------------|--------------------------------------------------------------------------------------------------------------------------------------------------------------------------------------------------|
| 301.                          | Problems of adolescent reproductive health are<br>(1) Unwanted pregnancy<br>(2) Unsafe abortion<br>(3) STI<br>(4) Maternal Death<br>(5) Complications of pregnancy<br>(6) Others (please specify) -----<br>(7) Don't know | <input type="checkbox"/><br><input type="checkbox"/><br><input type="checkbox"/><br><input type="checkbox"/><br><input type="checkbox"/><br><input type="checkbox"/><br><input type="checkbox"/> |
| Knowledge on pubertal changes |                                                                                                                                                                                                                           |                                                                                                                                                                                                  |
| 302.                          | What do you understand by puberty?<br>(1) Starting menarche<br>(2) Above 15 years old<br>(3) Don't know                                                                                                                   | <input type="checkbox"/>                                                                                                                                                                         |
| 303.                          | From where you get puberty knowledge when you were adolescents?<br>(1) Mother<br>(2) Parents<br>(3) Sisters/ Brothers<br>(4) Friends<br>(5) Others (please specify) -----                                                 | <input type="checkbox"/><br><input type="checkbox"/><br><input type="checkbox"/><br><input type="checkbox"/><br><input type="checkbox"/>                                                         |
| 304.                          | Physical changes of adolescents include<br>(1) Significantly getting taller<br>(2) Growth of breast buds & buttock<br>(3) Menstruation<br>(4) Growth of axillary's & pubic hair<br>(5) Others (please specify) -----      | <input type="checkbox"/><br><input type="checkbox"/><br><input type="checkbox"/><br><input type="checkbox"/><br><input type="checkbox"/>                                                         |
| 305.                          | Psychological changes of adolescents include<br>(1) Feeling shy<br>(2) Mood changes<br>(3) Interesting towards opposite sex<br>(4) Beautify and attractive<br>(5) Others (please specify) -----                           | <input type="checkbox"/><br><input type="checkbox"/><br><input type="checkbox"/><br><input type="checkbox"/><br><input type="checkbox"/>                                                         |
| 306.                          | Social changes of adolescents include<br>(1) Stay at home<br>(2) Go out with friends<br>(3) Go out alone<br>(4) Experimenting new ways life<br>(5) Fond of drugs<br>(6) Peer pressure<br>(7) Opposite scene from adults   | <input type="checkbox"/><br><input type="checkbox"/><br><input type="checkbox"/><br><input type="checkbox"/><br><input type="checkbox"/><br><input type="checkbox"/><br><input type="checkbox"/> |

|                                   |                                                                                                                                                                                                                                                            |                                                                                                                                                                                                                              |
|-----------------------------------|------------------------------------------------------------------------------------------------------------------------------------------------------------------------------------------------------------------------------------------------------------|------------------------------------------------------------------------------------------------------------------------------------------------------------------------------------------------------------------------------|
|                                   | (8) Fond of social media                                                                                                                                                                                                                                   | <input type="checkbox"/>                                                                                                                                                                                                     |
|                                   | (9) Others (please specify) -----                                                                                                                                                                                                                          | <input type="checkbox"/>                                                                                                                                                                                                     |
| <b>Knowledge on contraception</b> |                                                                                                                                                                                                                                                            |                                                                                                                                                                                                                              |
| 307.                              | From where you get contraceptive knowledge when you were adolescent?<br>(1) Mother<br>(2) Parents<br>(3) Sisters/ Brothers<br>(4) Friends<br>(5) Others (please specify) -----                                                                             | <input type="checkbox"/><br><input type="checkbox"/><br><input type="checkbox"/><br><input type="checkbox"/><br><input type="checkbox"/>                                                                                     |
| 308.                              | The contraceptive methods that you know<br>(1) Emergency Pills<br>(2) Combined OC pills<br>(3) Injections<br>(4) Condom<br>(5) IUCD<br>(6) Implant<br>(7) Sterilization<br>(8) Others (please specify) -----                                               | <input type="checkbox"/><br><input type="checkbox"/><br><input type="checkbox"/><br><input type="checkbox"/><br><input type="checkbox"/><br><input type="checkbox"/><br><input type="checkbox"/><br><input type="checkbox"/> |
| 309.                              | How do you think which contraceptive method is the suitable for the adolescent girls?<br>(1) Emergency Pills<br>(2) Combined OC pills<br>(3) Injections<br>(4) Condom<br>(5) IUCD<br>(6) Implant<br>(7) Sterilization<br>(8) Others (please specify) ----- | <input type="checkbox"/><br><input type="checkbox"/><br><input type="checkbox"/><br><input type="checkbox"/><br><input type="checkbox"/><br><input type="checkbox"/><br><input type="checkbox"/><br><input type="checkbox"/> |
| <b>Knowledge on STI</b>           |                                                                                                                                                                                                                                                            |                                                                                                                                                                                                                              |
| 310.                              | From where you get STI knowledge when you were adolescent?<br>(1) Mother<br>(2) Parents<br>(3) Sisters/ Brothers<br>(4) Friends<br>(5) Others (please specify) -----                                                                                       | <input type="checkbox"/><br><input type="checkbox"/><br><input type="checkbox"/><br><input type="checkbox"/><br><input type="checkbox"/>                                                                                     |
| 311.                              | What are the sexually transmitted infections?<br>(1) HIV/AIDS?<br>(2) Syphilis<br>(3) Gonorrhoea                                                                                                                                                           | <input type="checkbox"/><br><input type="checkbox"/><br><input type="checkbox"/>                                                                                                                                             |

|      |                                                                 |                          |
|------|-----------------------------------------------------------------|--------------------------|
|      | (4) Candidiasis                                                 | <input type="checkbox"/> |
|      | (5) Viral Hepatitis B                                           | <input type="checkbox"/> |
|      | (6) Others (please specify) -----                               | <input type="checkbox"/> |
| 312. | The transmission route of STI including HIV/AIDS                |                          |
|      | (1) Sexual relationship with the infected person without condom | <input type="checkbox"/> |
|      | (2) Blood transfusion from infected person                      | <input type="checkbox"/> |
|      | (3) Transmission from infected mother to child                  | <input type="checkbox"/> |
|      | (4) Tattooing, ear piercing                                     | <input type="checkbox"/> |
|      | (5) Sharing needles                                             | <input type="checkbox"/> |
|      | (6) Others (please specify) -----                               | <input type="checkbox"/> |
|      | (7) Don't know                                                  | <input type="checkbox"/> |
| 313. | Prevention of STI including HIV/AIDS                            |                          |
|      | (1) Abstinence                                                  | <input type="checkbox"/> |
|      | (2) Mutual faithfulness between partners                        | <input type="checkbox"/> |
|      | (3) Use condom with extramarital affairs/CSWs                   | <input type="checkbox"/> |
|      | (4) Avoid transfusion of unscreened blood                       | <input type="checkbox"/> |
|      | (5) Avoid tattooing/ ear piercing with unsterilized needle      | <input type="checkbox"/> |
|      | (6) Using disposable syringes/ needles                          | <input type="checkbox"/> |
|      | (7) PMCT                                                        | <input type="checkbox"/> |
|      | (8) Others (please specify) -----                               | <input type="checkbox"/> |
|      | (9) Don't know                                                  | <input type="checkbox"/> |

**Section (4) Communication with adolescent girls towards reproductive health issues**

|                            |                                                                                                                                                                                                                                                                                                                                                                        |                                                                                                                                                                                                                                                          |
|----------------------------|------------------------------------------------------------------------------------------------------------------------------------------------------------------------------------------------------------------------------------------------------------------------------------------------------------------------------------------------------------------------|----------------------------------------------------------------------------------------------------------------------------------------------------------------------------------------------------------------------------------------------------------|
| 401.                       | Have you discussed sexual and reproductive health with your daughter?<br>(1) Yes<br>(2) No                                                                                                                                                                                                                                                                             | <input type="checkbox"/>                                                                                                                                                                                                                                 |
| Frequency of Communication |                                                                                                                                                                                                                                                                                                                                                                        |                                                                                                                                                                                                                                                          |
| 402.                       | How many times you communicate with your adolescent daughter?<br>(1) Not at all in previous 6 months<br>(2) 1-3 times in previous 6 months<br>(3) More than or equal to 4 times in previous 6 months.                                                                                                                                                                  | <input type="checkbox"/>                                                                                                                                                                                                                                 |
| Content of Communication   |                                                                                                                                                                                                                                                                                                                                                                        |                                                                                                                                                                                                                                                          |
| 403.                       | Which topic do you discuss with your daughter?<br>(1) Function of Reproductive organs<br>(2) Pubertal changes<br>(3) Menstruation<br>(4) Conception<br>(5) STI including HIV/AIDS<br>(6) Contraceptives<br>(7) Condom use<br>(8) Romantic relationships<br>(9) Others (please specify) -----                                                                           | <input type="checkbox"/><br><input type="checkbox"/><br><input type="checkbox"/><br><input type="checkbox"/><br><input type="checkbox"/><br><input type="checkbox"/><br><input type="checkbox"/><br><input type="checkbox"/><br><input type="checkbox"/> |
| Timing of Communication    |                                                                                                                                                                                                                                                                                                                                                                        |                                                                                                                                                                                                                                                          |
| 404.                       | As far as you can recall, when was the first time you had sexual discussions with your daughter?<br>(1) When she was between the ages of 9 – 12 years.<br>(2) When she started menstruation.<br>(3) When she entered high school.<br>(4) When she started dating.<br>(5) When she started asking questions about sex and sex related issues<br>(6) I have not started. | <input type="checkbox"/>                                                                                                                                                                                                                                 |
| Style of communication     |                                                                                                                                                                                                                                                                                                                                                                        |                                                                                                                                                                                                                                                          |
| 405.                       | How do you discuss sex and sex-related issues with your daughter?<br>(1) Give the full information fully<br>(2) Give only information they should know<br>(3) Not willingly to answer the question<br>(4) Not allowed to ask question<br>(5) No response at all                                                                                                        | <input type="checkbox"/>                                                                                                                                                                                                                                 |

### Questionnaire forms for Adolescent Girl (English)

This questionnaire is only for research and the result will be kept confidential.

ID |\_| |\_| |\_|

Date -----

#### Section (1) Socio-demographic characteristics on adolescent girls

| No.  | Questions                                                                                                                                                                                                       | Code |
|------|-----------------------------------------------------------------------------------------------------------------------------------------------------------------------------------------------------------------|------|
| 101. | Age (completed Year)                                                                                                                                                                                            | _ _  |
| 102. | Education<br>(1) Illiterate<br>(2) Read and write<br>(3) Primary school passed<br>(4) Middle school passed<br>(5) High school passed<br>(6) University<br>(7) Graduate and above<br>(8) Others (please specify) | _    |
| 103. | Occupation<br>(1) Dependent/ Student<br>(2) Odd job<br>(3) Farmer<br>(4) Own business/ shop owner<br>(5) Government staff<br>(6) Company staff<br>(7) Others (please specify)                                   | _    |
| 104. | Birth order                                                                                                                                                                                                     | _    |
| 105. | Living with<br>(1) Mother<br>(2) Father<br>(3) Both parents<br>(4) Relative<br>(5) Friends<br>(6) Other (please specify)                                                                                        | _    |
| 106. | Types of family<br>(1) Nuclear<br>(2) Extended<br>(3) Three generation                                                                                                                                          | _    |
| 107. | Ethnicity                                                                                                                                                                                                       | _    |

|      |                                                                                                   |         |
|------|---------------------------------------------------------------------------------------------------|---------|
|      | (1) Burmese<br>(2) Pa-Oh<br>(3) Shan<br>(4) Danu<br>(5) Others(please specify)                    |         |
| 108. | Religion<br>(1) Buddhist<br>(2) Christian<br>(3) Islam<br>(4) Hindu<br>(5) Others(please specify) | _       |
| 109. | Pocket money per day (-----kyats per day)                                                         | _ _ _ _ |

**Section (2) Adolescent girl's perception on communicating with mother towards SRH issues**

| No.  | Perception on communicating with mother towards SRH issues                                     | SA | A | D | SD |
|------|------------------------------------------------------------------------------------------------|----|---|---|----|
| 201. | Talking about SRH with my mother is not embarrassing.                                          |    |   |   |    |
| 202. | Talking about SRH with my mother may cause tension.                                            |    |   |   |    |
| 203. | I do not know how to start SRH discussions with my mother.                                     |    |   |   |    |
| 204. | I want to talk to my mother about SRH but fear that my mother will think I am sexually active. |    |   |   |    |
| 205. | My mother may react badly if I ask about sexual and reproductive health issues.                |    |   |   |    |
| 206. | My mother wants to talk to me about sexual and reproductive health issues.                     |    |   |   |    |
| 207. | My mother knows enough about SRH to discuss with me                                            |    |   |   |    |
| 208. | I think religion is prohibited to discuss SRH with mothers.                                    |    |   |   |    |
| 209. | Discussing SRH issue between mother and adolescent daughter is traditionally acceptable.       |    |   |   |    |
| 210. | My mother is too busy to talk to me about SRH issues.                                          |    |   |   |    |



**Section (3) Knowledge of adolescent reproductive health problems**

|                                     |                                                                                                                                                                                                                                                              |                                                                                                                                                                                                                                 |
|-------------------------------------|--------------------------------------------------------------------------------------------------------------------------------------------------------------------------------------------------------------------------------------------------------------|---------------------------------------------------------------------------------------------------------------------------------------------------------------------------------------------------------------------------------|
| 301.                                | <p>Problems of adolescent reproductive health are</p> <p>(1) Unwanted pregnancy</p> <p>(2) Unsafe abortion</p> <p>(3) STI</p> <p>(4) Maternal Death</p> <p>(5) Complications of pregnancy</p> <p>(6) Others (please specify) -----</p> <p>(7) Don't know</p> | <p><input type="checkbox"/></p> |
| <p>Knowledge on Puberty Changes</p> |                                                                                                                                                                                                                                                              |                                                                                                                                                                                                                                 |
| 302.                                | <p>What do you understand by puberty?</p> <p>(1) Starting menarche</p> <p>(2) Above 15 years old</p> <p>(3) Don't know</p>                                                                                                                                   | <p><input type="checkbox"/></p>                                                                                                                                                                                                 |
| 303.                                | <p>From where you get puberty knowledge?</p> <p>(1) Mother</p> <p>(2) Parents</p> <p>(3) Sisters/ Brothers</p> <p>(4) Friends</p> <p>(5) Others (please specify) -----</p>                                                                                   | <p><input type="checkbox"/></p> <p><input type="checkbox"/></p> <p><input type="checkbox"/></p> <p><input type="checkbox"/></p> <p><input type="checkbox"/></p>                                                                 |
| 304.                                | <p>Physical changes includes</p> <p>(1) Significantly getting taller</p> <p>(2) Growth of breast buds &amp; buttock</p> <p>(3) Menstruation</p> <p>(4) Growth of axillary's &amp; pubic hair</p> <p>(5) Others (please specify) -----</p>                    | <p><input type="checkbox"/></p> <p><input type="checkbox"/></p> <p><input type="checkbox"/></p> <p><input type="checkbox"/></p> <p><input type="checkbox"/></p>                                                                 |
| 305.                                | <p>Psychological changes includes</p> <p>(1) Feeling shy</p> <p>(2) Mood changes</p> <p>(3) Interesting towards opposite sex</p> <p>(4) Beautify and attractive</p> <p>(5) Others (please specify) -----</p>                                                 | <p><input type="checkbox"/></p> <p><input type="checkbox"/></p> <p><input type="checkbox"/></p> <p><input type="checkbox"/></p> <p><input type="checkbox"/></p>                                                                 |
| 306.                                | <p>Social changes includes</p> <p>(1) Stay at home</p> <p>(2) Go out with friends</p> <p>(3) Go out alone</p> <p>(4) Experimenting new ways life</p> <p>(5) Fond of drugs</p> <p>(6) Peer pressure</p> <p>(7) Opposite scene from adults</p>                 | <p><input type="checkbox"/></p> |

|                                   |                                                                                                                                                                                                                                                    |                                                                                                                                                                                                                              |
|-----------------------------------|----------------------------------------------------------------------------------------------------------------------------------------------------------------------------------------------------------------------------------------------------|------------------------------------------------------------------------------------------------------------------------------------------------------------------------------------------------------------------------------|
|                                   | (8) Fond of social media                                                                                                                                                                                                                           | <input type="checkbox"/>                                                                                                                                                                                                     |
|                                   | (9) Others (please specify) -----                                                                                                                                                                                                                  | <input type="checkbox"/>                                                                                                                                                                                                     |
| <b>Knowledge on contraception</b> |                                                                                                                                                                                                                                                    |                                                                                                                                                                                                                              |
| 307.                              | From where you get contraceptive knowledge?<br>(1) Mother<br>(2) Parents<br>(3) Sisters/ Brothers<br>(4) Friends<br>(5) Others (please specify) -----                                                                                              | <input type="checkbox"/><br><input type="checkbox"/><br><input type="checkbox"/><br><input type="checkbox"/><br><input type="checkbox"/>                                                                                     |
| 308.                              | If yes, please specify the contraceptive methods that you know<br>(1) Emergency Pills<br>(2) Combined OC pills<br>(3) Injections<br>(4) Condom<br>(5) IUCD<br>(6) Implant                                                                          | <input type="checkbox"/><br><input type="checkbox"/><br><input type="checkbox"/><br><input type="checkbox"/><br><input type="checkbox"/><br><input type="checkbox"/>                                                         |
|                                   | (7) Sterilization<br>(8) Others (please specify) -----                                                                                                                                                                                             | <input type="checkbox"/><br><input type="checkbox"/>                                                                                                                                                                         |
| 309.                              | How do you think which contraceptive method is suitable for adolescent girls?<br>(1) Emergency Pills<br>(2) Combined OC pills<br>(3) Injections<br>(4) Condom<br>(5) IUCD<br>(6) Implant<br>(7) Sterilization<br>(8) Others (please specify) ----- | <input type="checkbox"/><br><input type="checkbox"/><br><input type="checkbox"/><br><input type="checkbox"/><br><input type="checkbox"/><br><input type="checkbox"/><br><input type="checkbox"/><br><input type="checkbox"/> |
| <b>Knowledge on STI</b>           |                                                                                                                                                                                                                                                    |                                                                                                                                                                                                                              |
| 310.                              | From where you get STI knowledge?<br>(1) Mother<br>(2) Parents<br>(3) Sisters/ Brothers<br>(4) Friends<br>(5) Others (please specify) -----                                                                                                        | <input type="checkbox"/><br><input type="checkbox"/><br><input type="checkbox"/><br><input type="checkbox"/><br><input type="checkbox"/>                                                                                     |
| 311.                              | What are the sexually transmitted infections?<br>(1) HIV/AIDS<br>(2) Syphilis<br>(3) Gonorrhoea<br>(4) Candidiasis                                                                                                                                 | <input type="checkbox"/><br><input type="checkbox"/><br><input type="checkbox"/><br><input type="checkbox"/>                                                                                                                 |

|      |                                                                 |                          |
|------|-----------------------------------------------------------------|--------------------------|
|      | (5) Viral Hepatitis B                                           | <input type="checkbox"/> |
|      | (6) Others (please specify) -----                               | <input type="checkbox"/> |
| 312. | The transmission route of STI including HIV/AIDS                |                          |
|      | (1) Sexual relationship with the infected person without condom | <input type="checkbox"/> |
|      | (2) Blood transfusion from infected person                      | <input type="checkbox"/> |
|      | (3) Transmission from infected mother to child                  | <input type="checkbox"/> |
|      | (4) Tattooing, ear piercing                                     | <input type="checkbox"/> |
|      | (5) Sharing needles                                             | <input type="checkbox"/> |
|      | (6) Others (please specify) -----                               | <input type="checkbox"/> |
|      | (7) Don't know                                                  | <input type="checkbox"/> |
| 313. | Prevention of STI including HIV/AIDS                            |                          |
|      | (1) Abstinence                                                  | <input type="checkbox"/> |
|      | (2) Mutual faithfulness between partners                        | <input type="checkbox"/> |
|      | (3) Use condom with extramarital affairs/CSWs                   | <input type="checkbox"/> |
|      | (4) Avoid transfusion of unscreened blood                       | <input type="checkbox"/> |
|      | (5) Avoid tattooing/ ear piercing with unsterilized needle      | <input type="checkbox"/> |
|      | (6) Using disposable syringes/ needles                          | <input type="checkbox"/> |
|      | (7) PMCT                                                        | <input type="checkbox"/> |
|      | (8) Others (please specify) -----                               | <input type="checkbox"/> |
|      | (9) Don't know                                                  | <input type="checkbox"/> |

**Section (4) Communication with mother towards Reproductive health**

|                            |                                                                                                                                                                                    |                          |
|----------------------------|------------------------------------------------------------------------------------------------------------------------------------------------------------------------------------|--------------------------|
| 401.                       | Have you discussed sexual and reproductive health issues with your mother?<br>(1) Yes<br>(2) No                                                                                    | <input type="checkbox"/> |
| Frequency of Communication |                                                                                                                                                                                    |                          |
| 402.                       | How often do you discuss about this issue?<br>(1) Not at all in previous 6 months<br>(2) 1-3 times in previous 6 months<br>(3) More than or equal to 4 times in previous 6 months. | <input type="checkbox"/> |

**Contents of Communication**

|      |                                                                                                                                                                                                                                                                                             |                                                                                                                                                                                                                                                          |
|------|---------------------------------------------------------------------------------------------------------------------------------------------------------------------------------------------------------------------------------------------------------------------------------------------|----------------------------------------------------------------------------------------------------------------------------------------------------------------------------------------------------------------------------------------------------------|
| 403. | Which topic do you discuss with your mother?<br>(1) Functions of Reproductive organs<br>(2) Pubertal changes<br>(3) Menstruation<br>(4) Conception<br>(5) STI including HIV/AIDS<br>(6) Contraceptives<br>(7) Condom use<br>(8) Romantic relationships<br>(9) Others (please specify) ----- | <input type="checkbox"/><br><input type="checkbox"/><br><input type="checkbox"/><br><input type="checkbox"/><br><input type="checkbox"/><br><input type="checkbox"/><br><input type="checkbox"/><br><input type="checkbox"/><br><input type="checkbox"/> |
|------|---------------------------------------------------------------------------------------------------------------------------------------------------------------------------------------------------------------------------------------------------------------------------------------------|----------------------------------------------------------------------------------------------------------------------------------------------------------------------------------------------------------------------------------------------------------|

**Timing of Communication**

|      |                                                                                                                                                                                                                                                                                                                                                             |                          |
|------|-------------------------------------------------------------------------------------------------------------------------------------------------------------------------------------------------------------------------------------------------------------------------------------------------------------------------------------------------------------|--------------------------|
| 404. | As far as you can recall, when was the first time your mother had sexual discussions with you?<br>(1) When I was between the ages of 9 – 12 years.<br>(2) When I started menstruation.<br>(3) When I entered High school.<br>(4) When I started dating.<br>(5) When I started asking questions about sex and sex related issues<br>(6) She has not started. | <input type="checkbox"/> |
|------|-------------------------------------------------------------------------------------------------------------------------------------------------------------------------------------------------------------------------------------------------------------------------------------------------------------------------------------------------------------|--------------------------|

**Style of communication**

|      |                                                                                                                                                                                                                                                                     |                          |
|------|---------------------------------------------------------------------------------------------------------------------------------------------------------------------------------------------------------------------------------------------------------------------|--------------------------|
| 405. | How does your mother discuss sex and sex-related issues with you?<br>(1) Give the full information fully<br>(2) Give only information they think necessary<br>(3) Not willingly to answer the question<br>(4) Not allowed to ask question<br>(5) No response at all | <input type="checkbox"/> |
|------|---------------------------------------------------------------------------------------------------------------------------------------------------------------------------------------------------------------------------------------------------------------------|--------------------------|

## Reference

---

1. Akpokiniovo FES. Mother and daughter communication on sexual issues in Namibia. University of Namibia. 2011. <http://hdl.handle.net/11070/557>.
2. Oo YTN, Zaw KK, Than KK, Mg TM, Mar KK, Aye SS. Do parents and adolescents talk about reproductive health? Myanmar adolescents' perspective. South East Asia Journal of Public Health. 2011; 1:40-45. ISSN: 2220-9476.
